# Supplementary material for: A Comparison Study of Lymph Node Tuberculosis and Sarcoidosis Involvement to Facilitate Differential Diagnosis and to Establish a Predictive Score for Tuberculosis
Source: MDPI journal article supplement (doi:10.3390/pathogens13050398), 2024-05-09
Supplement: s1 [file s1]

**Table S1: Comorbidities in sarcoidosis and TB patients**

| Comorbidities in sarcoidosis patients                | Immunosuppressive treatment | Comorbidities in TBC patients             | Immunosuppressive treatment |
|------------------------------------------------------|-----------------------------|-------------------------------------------|-----------------------------|
| HIV (n=1)                                            | /                           | HIV (n=9)                                 |                             |
| inflammatory bowel diseases (IBD) (n=4)              | Aziathropine (n=1)          | Hepatitis C virus (n=2)                   | Interferon (n=1)            |
| Fabry disease (n=1)                                  | /                           | active HBV infection (n=1)                |                             |
| Psoriasis (n=1)                                      | /                           | mixed connectivitis (Sharp disease) (n=1) | corticosteroids             |
| Diabetes type I (n=2)                                | /                           | Psoriasis (n=2)                           | Humira (n=2)                |
| haemolytic anaemia and atrophic polychondritis (n=1) | /                           | acute lymphoblastic leukemia (LLA) (n=1)  | Chemotherapy (n=1)          |
| myopathy of unknown origin (n=1)                     | /                           | Spondylarthritis (n=1)                    | Remicade (n=1)              |
| lymphoma (n=2)                                       | /                           | Sarcoidosis (n=1)                         | Corticosteroids (n=1)       |
| G6PD deficiency (n=1)                                | /                           | Renal graft (n=2)                         | Tacrolimus, corticosteroids |
| breast cancer (n=1)                                  | /                           | IBD (n=1)                                 | Anti-TNF (n=1)              |
| past medical history of tuberculosis                 | /                           | LMA (n=1)                                 | Decitabine (n=1)            |
|                                                      |                             | Rheumatoid Polyarthritis (n=1)            | Arava (n=1)                 |
|                                                      |                             | chronic renal disease (n=2)               | Dialysis (n=1)              |
|                                                      |                             | Histiocytosis (n=1)                       | Vinblastine (n=1)           |
